# Supplementary material for: The Preterm Heart in Childhood: Left Ventricular Structure, Geometry, and Function Assessed by Echocardiography in 6‐Year‐Old Survivors of Periviable Births
Source: PubMed Central journal article supplement — J Am Heart Assoc. 2018 Jan 20;7(2):e007742. doi: 10.1161/JAHA.117.007742 (PMC5850168; doi:10.1161/jaha.117.007742), 2018-01-20
Supplement: JAH3-7-e007742-s001.pdf [file JAH3-7-e007742-s001.pdf]

# Supplemental Material

**Table S1.** Cardiac dimensions and volumes in 6½-year-old girls born extremely preterm (EXPT) or at term (CTRL).

|                        | Girls EXPT*<br>(n=69) | Girls CTRL*<br>(n=52) | p-value | Adjusted† differences in means (95% CI) | p-value |
|------------------------|-----------------------|-----------------------|---------|-----------------------------------------|---------|
| <b>LA dimensions</b>   |                       |                       |         |                                         |         |
| LA <sub>s</sub> length | 33.8(5.1)             | 38.0(4.0)             | <0.001  | -0.5(-2.0;1.0)                          | 0.54    |
| LA <sub>s</sub> width  | 27.0(3.2)             | 28.6(2.8)             | 0.006   | -0.4(-1.5;0.8)                          | 0.55    |
| LA sphericity index    | 1.26(0.19)            | 1.34(0.17)            | 0.03    | 0.0007(-0.07;0.07)                      | 0.98    |
| <b>LV dimensions</b>   |                       |                       |         |                                         |         |
| LV <sub>d</sub> length | 54.7(4.1)             | 58.6(4.2)             | <0.001  | -1.9(-3.4;-0.4)                         | 0.02    |
| LV <sub>d</sub> width  | 35.4(3.2)             | 36.0(2.7)             | 0.30    | -0.3(-1.4;0.7)                          | 0.59    |
| LV sphericity index    | 1.55(0.16)            | 1.64(0.16)            | 0.004   | -0.04(-0.11;0.02)                       | 0.21    |
| AoV annulus            | 13.7(1.0)             | 15.0(0.9)             | <0.001  | -0.6(-1.0;-0.3)                         | <0.001  |
| <b>Volumes</b>         |                       |                       |         |                                         |         |
| SV, ml                 | 15.3(2.2)             | 17.3(2.7)             | <0.001  | -1.4(-2.4;-0.3)                         | 0.01    |
| CO, l/min              | 1.36(0.22)            | 1.47(0.22)            | 0.02    | -0.06(-0.2;0.04)                        | 0.22    |
| <b>Wall thickness</b>  |                       |                       |         |                                         |         |
| IVS <sub>d</sub>       | 5.5(0.9)              | 5.9(0.9)              | 0.005   | -0.2(-0.5;0.2)                          | 0.35    |
| PW <sub>d</sub>        | 5.3(0.7)              | 5.5(0.7)              | 0.11    | -0.1(-0.4;0.2)                          | 0.44    |
| Relative WT            | 0.31(0.04)            | 0.31(0.04)            | 0.88    | 0.0(-0.02;0.02)                         | 1.00    |
| LVM‡ g                 | 46.4(8.6)             | 54.9(10.1)            | <0.001  | -3.7(-7.0;-0.4)                         | 0.03    |

Data are mean (SD) and expressed in millimeters if not indicated otherwise. \*Unadjusted values.

†Differences in means adjusted to body surface area (m<sup>2</sup>) and site. ‡LVM calculated according to Devereux<sup>1</sup>.

AoV annulus=Aorta valve annulus diameter, CO=cardiac output, IVS=interventricular septum, LA=left atrium, LV=left ventricle, LVM=left ventricular mass, PW=posterior wall, Sphericity index=length/width. SV=stroke volume, WT=wall thickness.

**Table S2.** Cardiac dimensions and volumes in 6½-year-old boys born extremely preterm (EXPT) and at term (CTRL).

|                        | Boys EXPT*<br>(n=86) | Boys CTRL*<br>(n=77) | p-value | Adjusted† differences in<br>means (95% CI) | p-value |
|------------------------|----------------------|----------------------|---------|--------------------------------------------|---------|
| <b>LA dimensions</b>   |                      |                      |         |                                            |         |
| LA <sub>s</sub> length | 35.5(6.3)            | 40.2(5.0)            | <0.001  | -0.05(-1.7;1.6)                            | 0.95    |
| LA <sub>s</sub> width  | 27.4(3.0)            | 30.0(3.5)            | <0.001  | -1.0(-2.1;0.2)                             | 0.09    |
| LA sphericity index    | 1.30(0.21)           | 1.35(0.21)           | 0.12    | 0.04(-0.03;0.1)                            | 0.28    |
| <b>LV dimensions</b>   |                      |                      |         |                                            |         |
| LV <sub>d</sub> length | 54.6(4.4)            | 58.7(3.8)            | <0.001  | -1.7(-3.0;-0.4)                            | 0.008   |
| LV <sub>d</sub> width  | 35.6(3.3)            | 38.1(3.4)            | <0.001  | -1.6(-2.6;-0.5)                            | 0.003   |
| LV sphericity index    | 1.54(0.17)           | 1.55(0.14)           | 0.66    | 0.02(-0.04;0.07)                           | 0.56    |
| AoV annulus            | 14.1(1.1)            | 15.8(1.0)            | <0.001  | -1.0(-1.3;-0.06)                           | <0.001  |
| <b>Volumes</b>         |                      |                      |         |                                            |         |
| SV, ml                 | 16.1(3.0)            | 17.8(3.1)            | 0.0008  | -0.3(-1.4;0.7)                             | 0.53    |
| CO, l/min              | 1.38(0.26)           | 1.47(0.24)           | 0.03    | -0.009(-1.0;0.08)                          | 0.85    |
| <b>Wall thickness</b>  |                      |                      |         |                                            |         |
| IVS <sub>d</sub>       | 5.6(0.9)             | 6.2(0.7)             | <0.001  | -0.04(-0.3;0.2)                            | 0.69    |
| PW <sub>d</sub>        | 5.5(0.8)             | 5.7(0.7)             | 0.02    | 0.2(-0.05;0.4)                             | 0.13    |
| Relative WT            | 0.31(0.04)           | 0.31(0.04)           | 0.78    | 0.02(0.004;0.03)                           | 0.014   |
| LVM‡ g                 | 50.1(12.8)           | 62.3(10.8)           | <0.001  | -2.6(-5.8;0.6)                             | 0.11    |

Data are mean (SD) and expressed in millimeters if not indicated otherwise.

\*Unadjusted values.

†Mean difference adjusted to body surface area (m<sup>2</sup>) and site.

‡LVM calculated according to Devereux<sup>1</sup>

AoV annulus=Aorta valve annulus diameter, CO=cardiac output, IVS=interventricular septum, LA=left atrium, LV=left ventricle, LVM=left ventricular mass, PW=posterior wall, Sphericity index=length/width. SV=stroke volume, WT=wall thickness.

**Table S3.** Cardiac dimensions and volumes in 6½-year-old children born extremely preterm stratified by gestational age in weeks.

|                        | GA 22-24 wks*<br>(n=40) | GA 25-26 wks*<br>(n=105) | p-value | Adjusted <sup>†</sup> differences in means (95% CI) | p-value |
|------------------------|-------------------------|--------------------------|---------|-----------------------------------------------------|---------|
| <b>LA dimensions</b>   |                         |                          |         |                                                     |         |
| LA <sub>s</sub> length | 32.8(5.1)               | 35.3(5.8)                | 0.017   | 0.6(-0.9;2.1)                                       | 0.40    |
| LA <sub>s</sub> width  | 26.1(2.5)               | 27.6(3.2)                | 0.007   | 0.7(-0.3;1.8)                                       | 0.17    |
| LA sphericity index    | 1.26(0.18)              | 1.29(0.21)               | 0.52    | -0.007(-0.07;0.06)                                  | 0.82    |
| <b>LV dimensions</b>   |                         |                          |         |                                                     |         |
| LV <sub>d</sub> length | 53.9(4.1)               | 54.9(4.4)                | 0.22    | -0.3(-1.7;1.01)                                     | 0.63    |
| LV <sub>d</sub> width  | 34.8(3.3)               | 35.8(3.2)                | 0.09    | 0.5(-0.4;1.5)                                       | 0.28    |
| LV sphericity index    | 1.56(0.16)              | 1.54(0.18)               | 0.58    | -0.03(-0.09;0.02)                                   | 0.27    |
| AoV annulus            | 13.5(1.1)               | 14.0(1.0)                | 0.003   | 0.3(0.005;0.60)                                     | 0.05    |
| <b>Volumes</b>         |                         |                          |         |                                                     |         |
| SV, ml                 | 14.6(2.3)               | 16.1(2.4)                | 0.001   | 1.2(0.3;2.1)                                        | 0.01    |
| CO, l/min              | 1.28(0.28)              | 1.40(0.22)               | 0.009   | 0.1(0.008;0.02)                                     | 0.03    |
| <b>Wall thickness</b>  |                         |                          |         |                                                     |         |
| IVS <sub>d</sub>       | 5.4(1.0)                | 5.6(0.8)                 | 0.27    | -0.08(-0.4;0.2)                                     | 0.59    |
| PW <sub>d</sub>        | 5.3(0.7)                | 5.4(0.8)                 | 0.88    | -0.2(-0.4;0.08)                                     | 0.18    |
| Relative WT            | 0.32(0.05)              | 0.30(0.04)               | 0.14    | -0.02(-0.03;-0.002)                                 | 0.03    |
| LVM <sup>‡</sup> , g   | 43.9(7.7)               | 49.9(11.9)               | 0.003   | 1.1(-2.0;4.2)                                       | 0.48    |

Data are mean (SD) and expressed in millimeters if not indicated otherwise.

\*Unadjusted values.

<sup>†</sup>Mean difference adjusted to body surface area (m<sup>2</sup>) and site.

<sup>‡</sup>LVM calculated according to Devereux<sup>1</sup>

AoV annulus=Aorta valve annulus diameter, CO=cardiac output, IVS=interventricular septum, LA=left atrium, LV=left ventricle, LVM=left ventricular mass, PW=posterior wall, Sphericity index=length/width. SV=stroke volume, WT=wall thickness.

**Table S4.** Left heart systolic and diastolic function in 6½-year-old children born extremely preterm stratified by gestational age in weeks.

|                           | GW22-24*<br>(n=41) | GW 25-26*<br>(n=109) | p-value | Adjusted <sup>†</sup> differences<br>in means (95% CI) | p-value |
|---------------------------|--------------------|----------------------|---------|--------------------------------------------------------|---------|
| <b>Systolic function</b>  |                    |                      |         |                                                        |         |
| MAPSE, mm                 | 11.7(1.9)          | 12.8(1.8)            | 0.002   | 1.1(0.4;1.7)                                           | 0.002   |
| Shortening fraction       | 0.37(0.05)         | 0.36(0.04)           | 0.75    | -0.001(-0.02;0.02)                                     | 0.88    |
| <i>Septal</i>             |                    |                      |         |                                                        |         |
| TDI s', cm/s              | 6.4(0.8)           | 6.8(1.1)             | 0.04    | 0.4(0.08;0.8)                                          | 0.02    |
| MPI'                      | 0.44(0.08)         | 0.44(0.07)           | 0.55    | 0.009(-0.02;0.04)                                      | 0.56    |
| <i>Lateral</i>            |                    |                      |         |                                                        |         |
| TDI s', cm/s              | 8.0(1.8)           | 8.4(1.3)             | 0.15    | 0.4(-0.1;1.0)                                          | 0.12    |
| MPI'                      | 0.45(0.07)         | 0.42(0.06)           | 0.07    | -0.02(-0.05;0.003)                                     | 0.08    |
| <b>Diastolic function</b> |                    |                      |         |                                                        |         |
| MV E, cm/s                | 90.2(13.2)         | 91.0(13.0)           | 0.76    | 1.0(-3.4;5.5)                                          | 0.64    |
| MV A, cm/s                | 46.0(11.2)         | 47.8(10.9)           | 0.34    | 2.0(-1.9;5.9)                                          | 0.31    |
| <i>Septal</i>             |                    |                      |         |                                                        |         |
| Mitral e', cm/s           | 12.5(1.4)          | 12.4(1.5)            | 0.69    | -0.09(-0.6;0.4)                                        | 0.75    |
| Mitral a', cm/s           | 4.6(1.7)           | 4.6(1.2)             | 0.81    | 0.09(-0.4;0.6)                                         | 0.72    |
| E/e'                      | 7.3(1.3)           | 7.5(1.2)             | 0.33    | 0.2(-0.3;0.7)                                          | 0.37    |
| ivct, ms                  | 60(13)             | 60(12)               | 0.91    | -0.04(-5.0;4.3)                                        | 0.88    |
| ivrt, ms                  | 56(9)              | 58(10)               | 0.38    | 1.9(-1.7;5.5)                                          | 0.30    |
| <i>Lateral</i>            |                    |                      |         |                                                        |         |
| Mitral e', cm/s           | 16.2(2.7)          | 16.7(2.2)            | 0.35    | 0.5(-0.4;1.4)                                          | 0.30    |
| Mitral a', cm/s           | 5.2(1.4)           | 5.3(1.4)             | 0.71    | 0.2(-0.3;0.6)                                          | 0.49    |
| E/e'                      | 5.8(1.5)           | 5.6(1.1)             | 0.58    | -0.1(-0.6;0.4)                                         | 0.58    |
| ivct, ms                  | 64(14)             | 60(11)               | 0.09    | -4.1(-8.9;0.7)                                         | 0.09    |
| ivrt, ms                  | 56(10)             | 57(11)               | 0.71    | 1.1(-3.1;5.3)                                          | 0.61    |

\*Unadjusted mean (SD) values.

†Mean difference adjusted for site.

E/e' = transmitral early diastolic velocity indexed to mitral annular early diastolic velocity,

ivct = mitral annular isovolumic contraction time, ivrt = mitral annular isovolumic relaxation time,

MAPSE = Mitral annular plane systolic excursion, Mitral valve E = transmitral valve early diastolic

velocity, Mitral e' = mitral annular early diastolic velocity, Mitral a' = mitral annular late diastolic

velocity, TDI = Tissue Doppler Imaging, TDI s' = mitral annular systolic ejection velocity in, MPI' = TDI

derived myocardial performance index.

**Table S5.** Cardiac dimensions and volumes in 6½-year-old children born extremely preterm stratified by small for gestational age (SGA) or appropriate for gestational age (AGA) at birth.

|                        | SGA*<br>(n=22) | AGA*<br>(n=123) | p-value | Adjusted <sup>†</sup> differences in<br>means (95% CI) | p-value |
|------------------------|----------------|-----------------|---------|--------------------------------------------------------|---------|
| <b>LA dimensions</b>   |                |                 |         |                                                        |         |
| LA <sub>s</sub> length | 31.8(4.6)      | 35.1(5.7)       | 0.010   | -0.6(-2.5;1.3)                                         | 0.52    |
| LA <sub>s</sub> width  | 25.7(3.2)      | 27.4(3.0)       | 0.016   | -0.7(-2.07;0.6)                                        | 0.27    |
| LA sphericity index    | 1.25(0.19)     | 1.29(0.20)      | 0.40    | 0.02(-0.07;0.10)                                       | 0.69    |
| <b>LV dimensions</b>   |                |                 |         |                                                        |         |
| LV <sub>d</sub> length | 52.5(4.3)      | 54.9(4.2)       | 0.015   | -1.4(-3.1;0.3)                                         | 0.10    |
| LV <sub>d</sub> width  | 35.7(3.2)      | 35.5(3.2)       | 0.81    | 0.07(-1.2;1.3)                                         | 0.91    |
| LV sphericity index    | 1.48(0.18)     | 1.56(0.17)      | 0.06    | -0.04(-0.1;0.03)                                       | 0.24    |
| AoV annulus            | 13.5(1.05)     | 13.9(1.07)      | 0.10    | 0.009(-0.03;0.05)                                      | 0.62    |
| <b>Volumes</b>         |                |                 |         |                                                        |         |
| SV, ml                 | 15.5(2.2)      | 15.6(2.5)       | 0.81    | 0.2(-1.0;1.46)                                         | 0.68    |
| CO, l/min              | 1.40(0.22)     | 1.36(0.24)      | 0.60    | 0.06(-0.06;0.2)                                        | 0.34    |
| <b>Wall thickness</b>  |                |                 |         |                                                        |         |
| IVS <sub>d</sub>       | 5.4(1.0)       | 5.6(0.9)        | 0.41    | 0.05(-0.3;0.4)                                         | 0.78    |
| PW <sub>d</sub>        | 5.2(0.8)       | 5.4(0.8)        | 0.20    | -0.06(-0.4;0.2)                                        | 0.69    |
| Relative WT            | 0.30(0.04)     | 0.31(0.04)      | 0.69    | -0.0004(-0.02;0.02)                                    | 0.97    |
| LVM <sup>‡</sup> g     | 44.9(13.4)     | 48.8(10.6)      | 0.12    | 0.3(-3.4;3.9)                                          | 0.89    |

Data are mean (SD) and expressed in millimeters if not indicated otherwise.

\*Unadjusted values.

<sup>†</sup> Difference in means adjusted to body surface area (m<sup>2</sup>) and site.

<sup>‡</sup>LVM calculated according to Devereux<sup>1</sup>

AoV annulus=Aorta valve annulus diameter, CO=cardiac output, IVS=interventricular septum, LA=left atrium, LV=left ventricle, LVM=left ventricular mass, PW=posterior wall, Sphericity index=length/width. SV=stroke volume, WT=wall thickness.

**Table S6.** Left heart systolic and diastolic function in 6½-year-old children born extremely preterm stratified by small for gestational age (SGA) and appropriate for gestational age (AGA) at birth.

|                           | SGA* (n=26) | AGA* (n=139) | p-value | Adjusted <sup>†</sup> differences in means (95% CI) | p-value |
|---------------------------|-------------|--------------|---------|-----------------------------------------------------|---------|
| <b>Systolic function</b>  |             |              |         |                                                     |         |
| MAPSE, mm                 | 12.2(2.2)   | 12.5(1.8)    | 0.42    | -0.4(-1.2;0.5)                                      | 0.37    |
| Shortening fraction       | 0.37(0.04)  | 0.36(0.05)   | 0.41    | 0.005(-0.02;0.02)                                   | 0.63    |
| <i>Septal</i>             |             |              |         |                                                     |         |
| TDI s', cm/s              | 6.4(0.8)    | 6.7(1.0)     | 0.31    | -0.5(-1.0;0.001)                                    | 0.05    |
| MPI'                      | 0.46(0.06)  | 0.44(0.07)   | 0.29    | 0.02(-0.02;0.06)                                    | 0.26    |
| <i>Lateral</i>            |             |              |         |                                                     |         |
| TDI s', cm/s              | 8.3(1.4)    | 8.3(1.5)     | 0.96    | -0.2(-0.9;0.5)                                      | 0.60    |
| MPI'                      | 0.46(0.06)  | 0.42(0.06)   | 0.05    | 0.03(-0.004;0.06)                                   | 0.08    |
| <b>Diastolic function</b> |             |              |         |                                                     |         |
| MV E, cm/s                | 95.5(16.0)  | 89.9(12.3)   | 0.06    | 4.4(-1.3;10.1)                                      | 0.13    |
| MV A, cm/s                | 47.6(10.5)  | 47.2(11.1)   | 0.89    | -0.1(-5.2;4.9)                                      | 0.96    |
| <i>Septal</i>             |             |              |         |                                                     |         |
| Mitral e', cm/s           | 12.3(1.3)   | 12.4(1.5)    | 0.73    | -0.3(-1.0;0.4)                                      | 0.40    |
| Mitral a', cm/s           | 4.4(1.0)    | 4.6(1.4)     | 0.56    | -0.4(-1.0;0.2)                                      | 0.23    |
| E/e'                      | 8.0(1.7)    | 7.3(1.2)     | 0.038   | 0.6(-0.02;1.2)                                      | 0.06    |
| ivct, ms                  | 63(12)      | 59(12)       | 0.23    | 4.5(-1.6;10.6)                                      | 0.15    |
| ivrt, ms                  | 60(7)       | 57(10)       | 0.22    | 1.6(-3.1;6.4)                                       | 0.50    |
| <i>Lateral</i>            |             |              |         |                                                     |         |
| Mitral e', cm/s           | 17.0(2.4)   | 16.5(2.4)    | 0.41    | 0.2(-0.9;1.4)                                       | 0.69    |
| Mitral a', cm/s           | 5.8(1.8)    | 5.1(1.3)     | 0.06    | 0.2(-0.4;0.8)                                       | 0.46    |
| E/e'                      | 5.9(1.7)    | 5.6(1.1)     | 0.35    | 0.3(-0.4;0.9)                                       | 0.38    |
| ivct, ms                  | 65(11)      | 60(12)       | 0.17    | 4.8(-1.4;11.1)                                      | 0.13    |
| ivrt, ms                  | 59(13)      | 56(11)       | 0.26    | 1.4(-4.1;6.9)                                       | 0.62    |

\*Unadjusted values.



† Differences in means adjusted for site.

E/e' = transmitral early diastolic velocity indexed to mitral annular early diastolic velocity,  
ivct = mitral annular isovolumic contraction time, ivrt = mitral annular isovolumic relaxation time,  
MAPSE = Mitral annular plane systolic excursion, Mitral valve E = transmitral valve early diastolic  
velocity, Mitral e' = mitral annular early diastolic velocity, Mitral a' = mitral annular late diastolic  
velocity, TDI = Tissue Doppler Imaging, TDI s' = mitral annular systolic ejection velocity in, MPI' = TDI  
derived myocardial performance index.

**Table S7.** Cardiac dimensions and volumes in 6½-year-old children born extremely preterm (EXPT) stratified by presence of hemodynamically significant PDA in the neonatal period.

|                        | PDA*<br>(n=90) | No PDA*<br>(n=58) | p-value | Adjusted <sup>†</sup> differences in<br>means (95% CI) | p-value |
|------------------------|----------------|-------------------|---------|--------------------------------------------------------|---------|
| <b>LA dimensions</b>   |                |                   |         |                                                        |         |
| LA <sub>s</sub> length | 34.7(5.8)      | 34.7(5.8)         | 0.98    | 1.0(-0.4;2.4)                                          | 0.16    |
| LA <sub>s</sub> width  | 27.0(3.1)      | 27.6(3.2)         | 0.21    | -0.4(-1.4;0.6)                                         | 0.41    |
| LA sphericity index    | 1.29(0.2)      | 1.26(0.2)         | 0.33    | 0.06(-0.003;0.1)                                       | 0.06    |
| <b>LV dimensions</b>   |                |                   |         |                                                        |         |
| LV <sub>d</sub> length | 54.2(4.1)      | 55.2(4.6)         | 0.18    | 0.02(-1.3;1.3)                                         | 0.98    |
| LV <sub>d</sub> width  | 35.4(3.1)      | 35.8(3.4)         | 0.42    | -0.01(-0.9;0.9)                                        | 0.98    |
| LV sphericity index    | 1.54(0.2)      | 1.55(0.2)         | 0.62    | -0.002(-0.06;0.06)                                     | 0.95    |
| AoV annulus            | 13.8(1.0)      | 14.0(1.1)         | 0.20    | 0.05(-0.2;0.3)                                         | 0.72    |
| <b>Volumes</b>         |                |                   |         |                                                        |         |
| SV, ml                 | 15.5(2.8)      | 16.1(2.1)         | 0.18    | -0.06(-1.0;0.8)                                        | 0.89    |
| CO, l/min              | 1.38(0.3)      | 1.35(0.2)         | 0.50    | 0.07(-0.2;0.2)                                         | 0.13    |
| <b>Wall thickness</b>  |                |                   |         |                                                        |         |
| IVS <sub>d</sub>       | 5.5(0.9)       | 5.6(0.9)          | 0.22    | -0.01(-0.3;0.3)                                        | 0.94    |
| PW <sub>d</sub>        | 5.3(0.8)       | 5.5(0.7)          | 0.17    | -0.2(-0.4;0.1)                                         | 0.24    |
| Relative WT            | 0.31(0.05)     | 0.31(0.04)        | 0.90    | 0.006(-0.009;0.02)                                     | 0.43    |
| LVM <sup>‡</sup> , g   | 46.3(9.3)      | 51.4(13.1)        | 0.006   | -2.8(-5.7;-0.03)                                       | 0.05    |

Data are mean (SD) and expressed in millimeters if not indicated otherwise.

\* Unadjusted values.

<sup>†</sup> Differences in means adjusted to body surface area (m<sup>2</sup>) , gestational age in weeks, and site.

<sup>‡</sup>LVM calculated according to Devereux<sup>1</sup>

AoV annulus=Aorta valve annulus diameter, CO=cardiac output, IVS=interventricular septum, LA=left atrium, LV=left ventricle, LVM=left ventricular mass, PW=posterior wall, Sphericity index=length/width. SV=stroke volume, WT=wall thickness.

**Table S8.** Left heart systolic and diastolic function in 6½-year-old children born extremely preterm stratified by stratified by presence of hemodynamically significant PDA.

|                           | PDA*<br>(n=91) | PDA*<br>(n=59) | p-value | Adjusted <sup>†</sup> differences<br>in means (95% CI) | p-value |
|---------------------------|----------------|----------------|---------|--------------------------------------------------------|---------|
| <b>Systolic function</b>  |                |                |         |                                                        |         |
| MAPSE, mm                 | 12.3(1.9)      | 12.8(1.8)      | 0.14    | -0.3(-0.9;0.4)                                         | 0.40    |
| Shortening fraction       | 0.36(0.04)     | 0.37(0.04)     | 0.09    | -0.01(-0.03;0.0008)                                    | 0.06    |
| <i>Septal</i>             |                |                |         |                                                        |         |
| TDI s', cm/s              | 6.7(1.1)       | 6.6(0.8)       | 0.36    | 0.3(-0.05;0.6)                                         | 0.09    |
| MPI'                      | 0.43(0.06)     | 0.44(0.07)     | 0.40    | -0.01(-0.03;0.01)                                      | 0.40    |
| <i>Lateral</i>            |                |                |         |                                                        |         |
| TDI s', cm/s              | 8.3(1.5)       | 8.2(1.3)       | 0.71    | 0.2(-0.4;0.7)                                          | 0.49    |
| MPI'                      | 0.45(0.07)     | 0.44(0.06)     | 0.42    | 0.01(-0.04;0.01)                                       | 0.31    |
| <b>Diastolic function</b> |                |                |         |                                                        |         |
| MV E, cm/s                | 89.3(12.5)     | 93.1(13.5)     | 0.08    | -4.6(-9.0;-0.3)                                        | 0.04    |
| MV A, cm/s                | 47.5(10.4)     | 47.0(12.1)     | 0.78    | 0.5(-3.4;4.3)                                          | 0.81    |
| <i>Septal</i>             |                |                |         |                                                        |         |
| Mitral e', cm/s           | 12.3(1.4)      | 12.6(1.4)      | 0.14    | -0.4(-0.9;0.1)                                         | 0.13    |
| Mitral a', cm/s           | 4.6(1.2)       | 4.5(1.6)       | 0.80    | 0.1(-0.4;0.6)                                          | 0.61    |
| E/e'                      | 7.4(1.2)       | 7.5(1.4)       | 0.51    | -0.1(-0.6;0.3)                                         | 0.56    |
| ivct, ms                  | 60(14)         | 59(10)         | 0.51    | 1.3(-3.3;5.9)                                          | 0.58    |
| ivrt, ms                  | 56(10)         | 58(10)         | 0.29    | -1.5(-5.0;2.0)                                         | 0.40    |
| <i>Lateral</i>            |                |                |         |                                                        |         |
| Mitral e', cm/s           | 16.3(2.3)      | 16.9(2.5)      | 0.19    | -0.6(-1.4;0.3)                                         | 0.20    |
| Mitral a', cm/s           | 5.3(1.5)       | 5.1(1.3)       | 0.52    | 0.2(-0.2;0.7)                                          | 0.26    |
| E/e'                      | 5.6(1.2)       | 5.7(1.4)       | 0.66    | -0.1(-0.6;0.4)                                         | 0.68    |
| ivct, ms                  | 60(12)         | 62(12)         | 0.34    | -3.2(-7.9;1.4)                                         | 0.17    |
| ivrt, ms                  | 55(11)         | 59(11)         | 0.07    | -3.3(-7.3;0.7)                                         | 0.10    |

\*Unadjusted values.

† Differences in means adjusted for gestation age in weeks & site.

E/e' = transmitral early diastolic velocity indexed to mitral annular early diastolic velocity,  
ivct = mitral annular isovolumic contraction time, ivrt = mitral annular isovolumic relaxation time,  
MAPSE = Mitral annular plane systolic excursion, Mitral valve E = transmitral valve early diastolic  
velocity, Mitral e' = mitral annular early diastolic velocity, Mitral a' = mitral annular late diastolic  
velocity, TDI = Tissue Doppler Imaging, TDI s' = mitral annular systolic ejection velocity in, MPI' = TDI  
derived myocardial performance index.

**Supplemental Reference:**

1. Devereux RB, Alonso DR, Lutas EM, Gottlieb GJ. Echocardiographic assessment of left ventricular hypertrophy: comparison to necropsy findings. *Am J Cardiol.* 1986;57:450-458.
